# Supplementary material for: Human Serum Albumin (HSA) Suppresses the Effects of Glycerol Monolaurate (GML) on Human T Cell Activation and Function
Source: PubMed Central journal article supplement (PMC5072635; doi:10.1371/journal.pone.0165083), 2016-10-20

Supplementary Figure 2

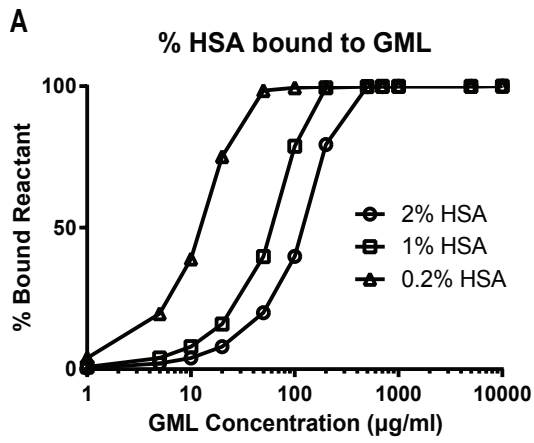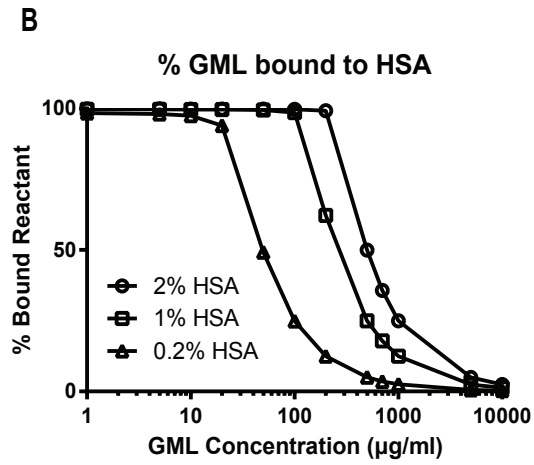

Supplement: pone.0165083.s002.pdf [file pone.0165083.s002.pdf]
